# Supplementary material for: Brief Communication: Reduction of the future Greenland ice sheetsurface melt with the help of solar geoengineering
Source: Copernicus journal article supplement (doi:10.5194/tc-2020-347), 2020-12-04
Supplement: Supplementary file 1 [file tc-2020-347-supplement.pdf]

## ***SUPPLEMENTARY MATERIAL of***

### ***Brief Communication: "Reduction of the future Greenland ice sheet surface melt with the help of solar geoengineering"***

5 Xavier Fettweis<sup>1</sup>, Stefan Hofer<sup>1,2</sup>, Roland Séférian<sup>3</sup>, Charles Amory<sup>1,4</sup>, Alison Delhasse<sup>1</sup>, Sébastien  
Doutreloup<sup>1</sup>, Christoph Kittel<sup>1</sup>, Charlotte Lang<sup>1</sup>, Joris Van Bever<sup>1,5</sup>, Florent Veillon<sup>1</sup>, Peter Irvine<sup>6</sup>

<sup>1</sup>SPHERES research units, Geography Department, University of Liège, Liège, Belgium

<sup>2</sup>Department of Geosciences, University of Oslo, Oslo, Norway

<sup>3</sup>CNRM, Université de Toulouse, Météo-France, CNRS, Toulouse, France

<sup>4</sup>Univ. Grenoble Alpes, CNRS, Institut des Géosciences de l'Environnement, Grenoble, France

10 <sup>5</sup>Earth System Science, Departement Geografie, Vrije Universiteit Brussel, Brussels, Belgium

<sup>6</sup>Earth Sciences, University College London, London, UK

*Correspondence to:* Xavier Fettweis ([xavier.fettweis@uliege.be](mailto:xavier.fettweis@uliege.be))

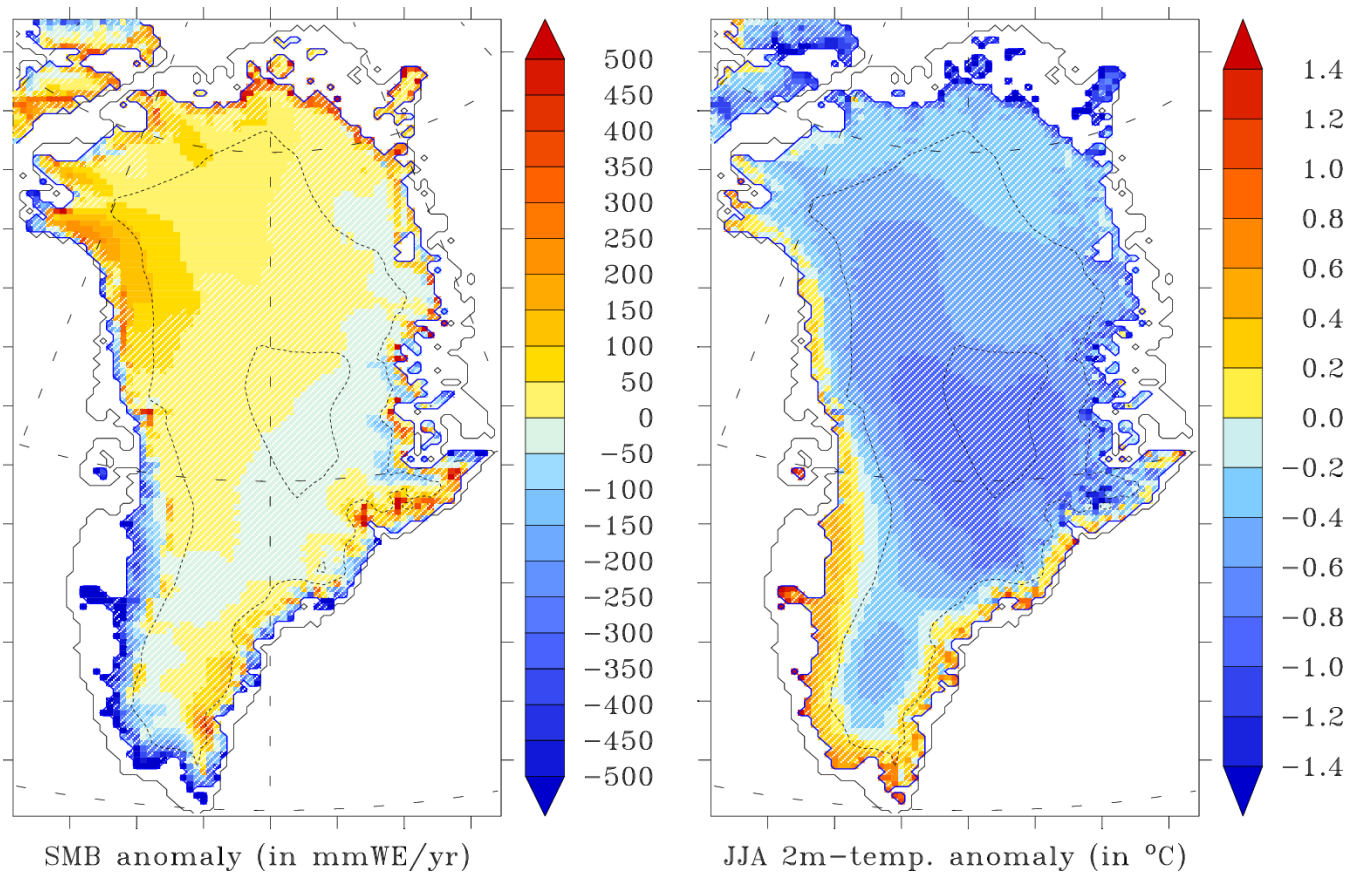

15 **Fig S1: Annual SMB (in mmWE/yr) and summer 2m-temperature anomaly (in °C) of MAR forced by CNRM-ESM2-1 vs MAR forced by ERA5 over 1981-2100. The anomalies lower than the 1981-2010 interannual variability are hatched. All the anomalies are lower than 2 times the interannual variability and are then not statistically significant. The ice-sheet margins are represented by a blue line.**
